# Supplementary material for: Infectivity of Wild-Bird Origin Influenza A Viruses in Minnesota Wetlands across Seasons
Source: MDPI journal article supplement (doi:10.3390/pathogens13050406), 2024-05-14
Supplement: s1 [file s1]

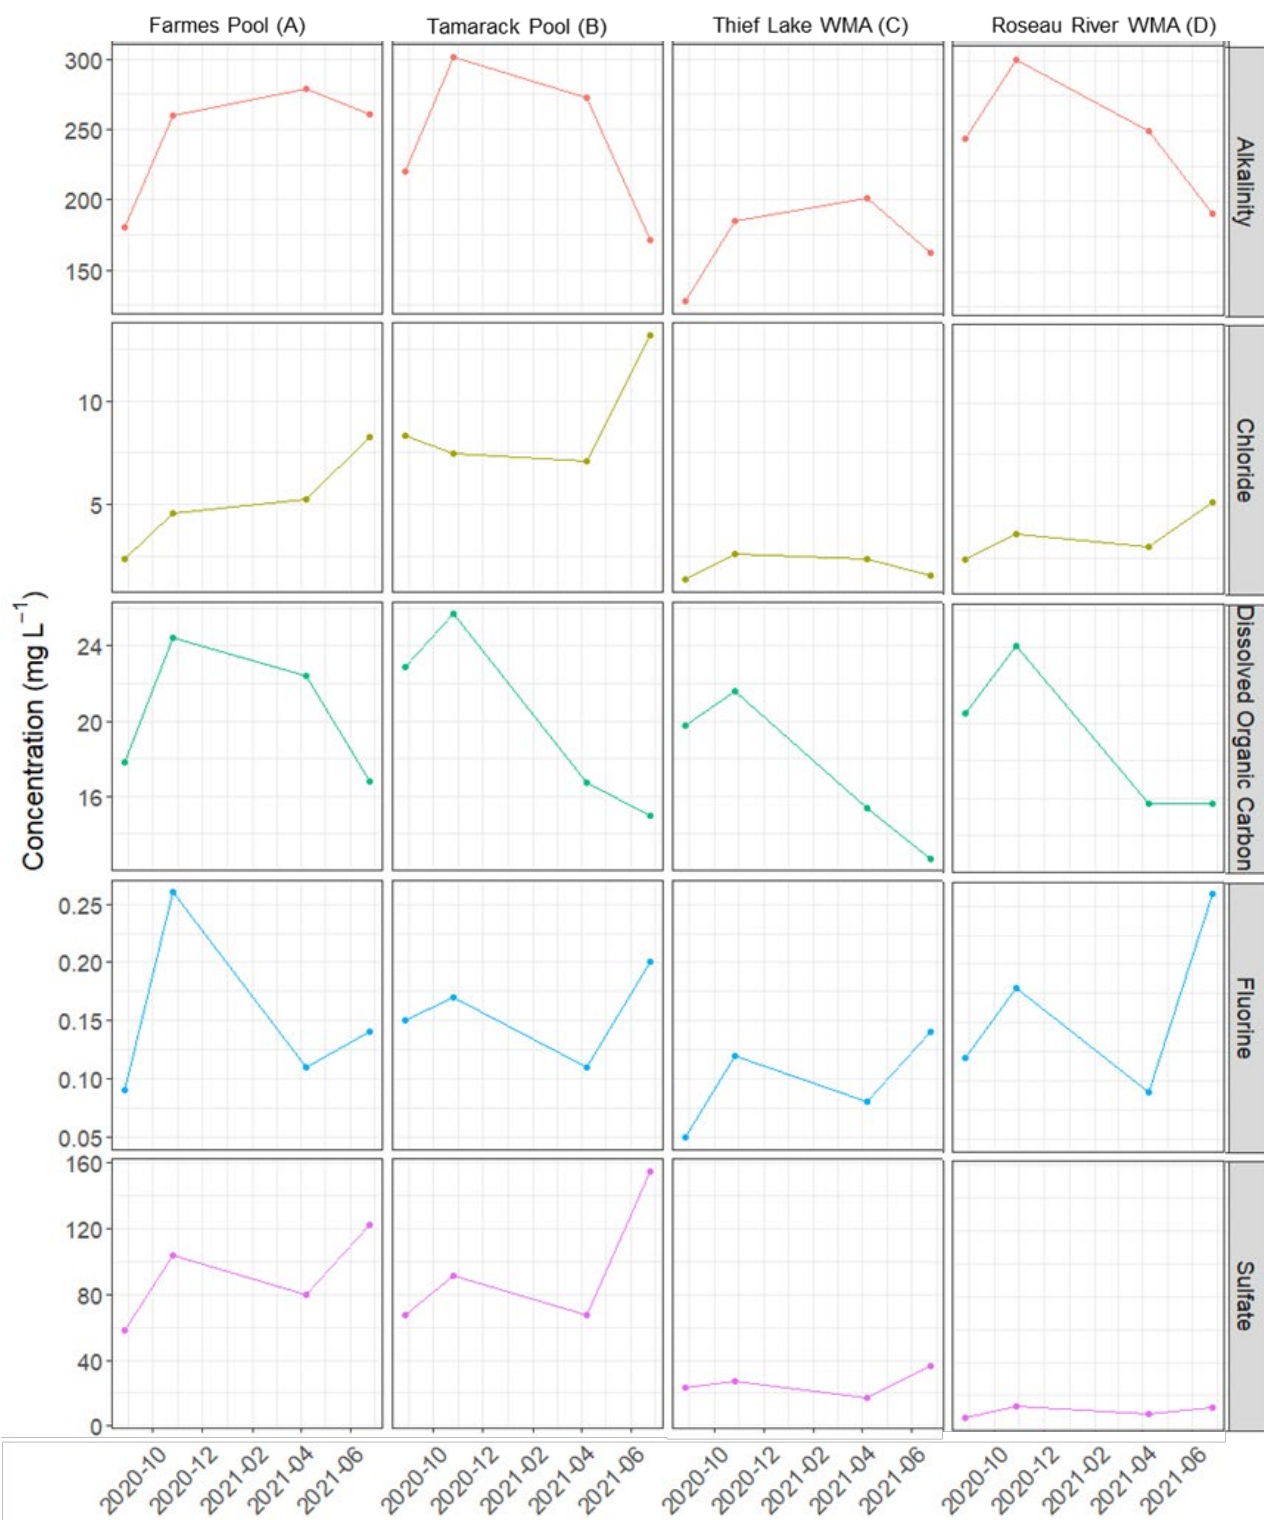

Supplemental Figure S3. Plots of alkalinity, chloride, DOC, fluorine and sulfate, as measured in mg/L for surface waters of four sampling sites (Farms Pool (A), Tamarack Pool (B), Thief Lake WMA (C) and Roseau River WMA (D)), and at four time points (T1 = September 2020; T2 = October 2020; T3 = April 2021, T4 = June 2021).
