# Supplementary figures and images for: Infectivity of Wild-Bird Origin Influenza A Viruses in Minnesota Wetlands across Seasons
Source: MDPI journal article supplement (doi:10.3390/pathogens13050406), 2024-05-14

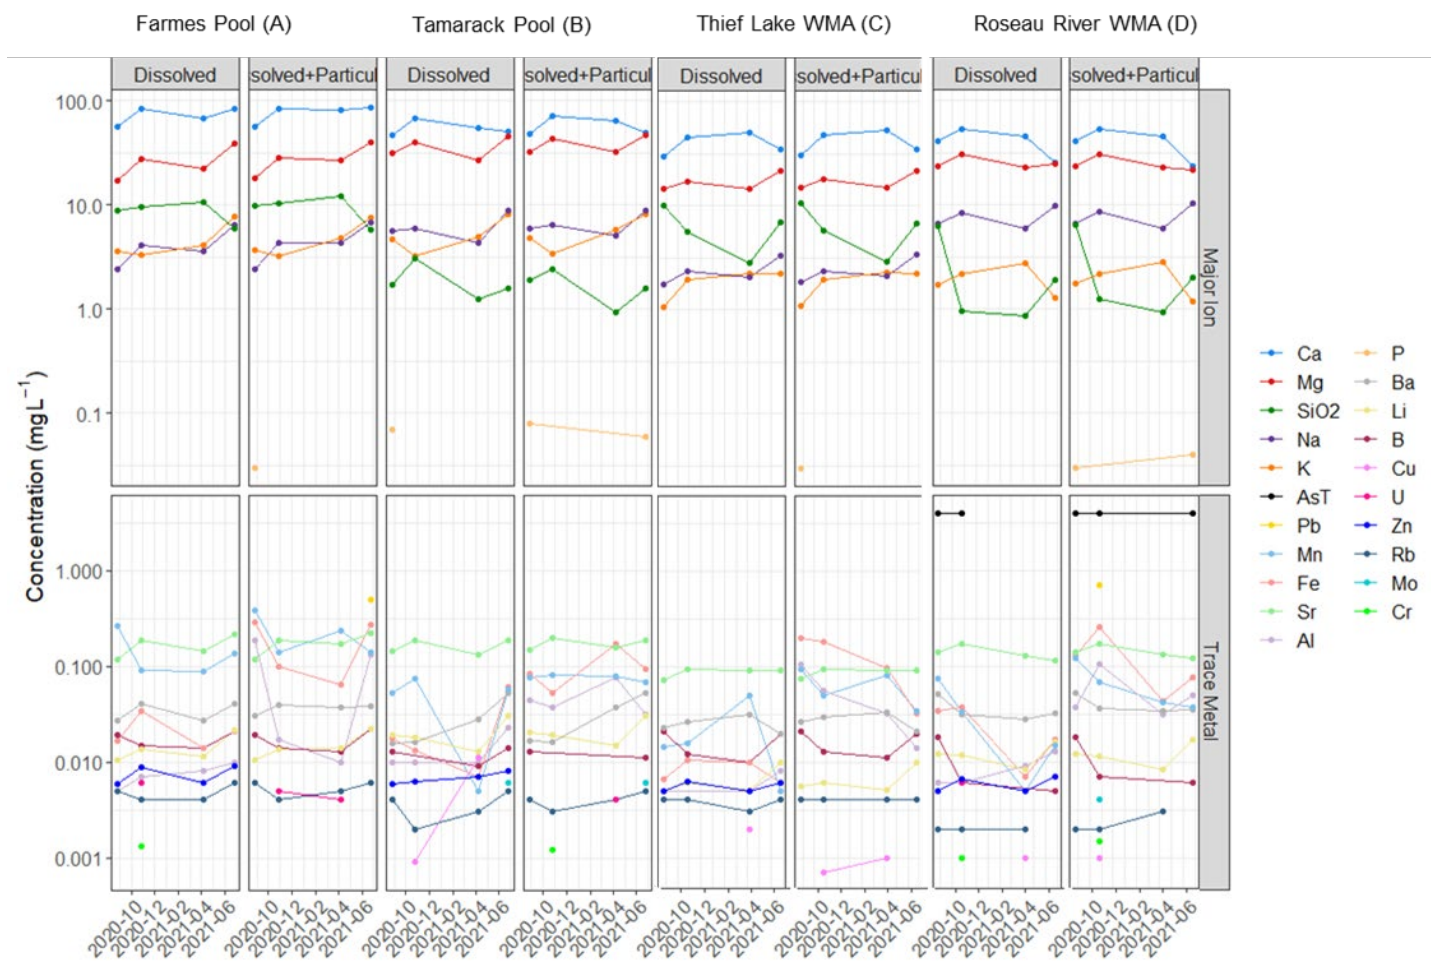

Supplement: s1 [file s1]
